# Supplementary material
Source: PubMed Central journal article supplement (PMC11422989)
Supplement: media-1.pdf [file media-1.pdf]

**Table S1** Identified cross-linked peptides of sample 1 between <sup>15</sup>N-Ac- $\alpha$ -syn and <sup>14</sup>N-Ac- $\alpha$ -syn in LPC (protein: lipid= 1: 50, mol: mol).

| Score    | $\Delta$ (ppm) | Res of Pr 1* | Sequence of Pr 1*                                                         | Res of Pr2* | Sequence of Pr 2*                                           | Mass (Da) |
|----------|----------------|--------------|---------------------------------------------------------------------------|-------------|-------------------------------------------------------------|-----------|
| 1.43E-20 | -0.67          | 12           | A <sup>11</sup> <u>K</u> EGVVAAAEEK <sup>21</sup>                         | 23          | T <sup>22</sup> <u>K</u> QGVAAEAAGK <sup>32</sup>           | 2268.2324 |
| 5.94E-14 | 0.65           | 32           | Q <sup>24</sup> GVAEAAGKTK <sup>34</sup>                                  | 10          | G <sup>9</sup> LS <u>K</u> AK <sup>12</sup>                 | 1799.0151 |
| 8.04E-13 | -0.04          | 34           | T <sup>33</sup> <u>K</u> EGVLYVGSK <sup>43</sup>                          | 23          | T <sup>22</sup> <u>K</u> QGVAAEAAGK <sup>32</sup>           | 2376.2899 |
| 2.17E-12 | -1.77          | 32           | T <sup>22</sup> KQGVAAEAAG <u>K</u> TK <sup>34</sup>                      | 23          | T <sup>22</sup> <u>K</u> QGVAAEAAGK <sup>32</sup>           | 2484.3546 |
| 5.89E-12 | 0.46           | 45           | T <sup>44</sup> <u>K</u> EGVVHGVATVAEK <sup>58</sup>                      | 12          | T <sup>22</sup> <u>K</u> QGVAAEAAGK <sup>32</sup>           | 2733.4911 |
| 1.33E-11 | 0.22           | 12           | A <sup>11</sup> <u>K</u> EGVVAAAEEK <sup>21</sup>                         | 97          | <u>K</u> <sup>97</sup> DQLGK <sup>102</sup>                 | 1897.0519 |
| 2.22E-11 | -2.07          | 58           | T <sup>44</sup> KEGVVHGVATVAE <u>K</u> TK <sup>60</sup>                   | 10          | G <sup>9</sup> LS <u>K</u> AK <sup>12</sup>                 | 2493.4165 |
| 1.49E-10 | -2.77          | 23           | T <sup>22</sup> <u>K</u> QGVAAEAAGK <sup>32</sup>                         | 97          | <u>K</u> <sup>97</sup> DQLGK <sup>102</sup>                 | 1884.0315 |
| 2.94E-10 | -1.25          | 34           | T <sup>33</sup> <u>K</u> EGVLYVGSK <sup>43</sup>                          | 12          | A <sup>11</sup> <u>K</u> EGVVAAAEEK <sup>21</sup>           | 2389.3103 |
| 1.42E-08 | -1.10          | 21           | E <sup>13</sup> GVVAAA <u>E</u> TK <sup>23</sup>                          | 10          | G <sup>9</sup> LS <u>K</u> AK <sup>12</sup>                 | 1842.0461 |
| 2.07E-08 | -0.67          | 58           | E <sup>46</sup> GVVHGVATVAE <u>K</u> TKEQVTNVGGAVVTGVTAVAQK <sup>80</sup> | 12          | G <sup>7</sup> LSK <u>A</u> KEGVVAAAEEK <sup>21</sup>       | 5027.7505 |
| 3.43E-08 | -2.37          | 43           | T <sup>33</sup> <u>K</u> EGVLYVGS <u>K</u> TK <sup>45</sup>               | 10          | G <sup>9</sup> LS <u>K</u> AK <sup>12</sup>                 | 2149.2357 |
| 5.39E-07 | 2.62           | 43           | T <sup>33</sup> <u>K</u> EGVLYVGS <u>K</u> TK <sup>45</sup>               | 43          | T <sup>33</sup> <u>K</u> EGVLYVGS <u>K</u> TK <sup>45</sup> | 2955.6531 |

$\Delta$ : mass error for crosslink assignments; Res: crosslinked residue (sequence number) within corresponding proteins; Pr: protein; Underlined K in sequence is the cross-linked lysine.

\*The crosslinked pair of residues were from two individual Ac- $\alpha$ -syn: <sup>14</sup>N-Ac- $\alpha$ -syn and <sup>14</sup>N-Ac- $\alpha$ -syn, <sup>14</sup>N-Ac- $\alpha$ -syn and <sup>15</sup>N-Ac- $\alpha$ -syn, <sup>15</sup>N-Ac- $\alpha$ -syn and <sup>14</sup>N-Ac- $\alpha$ -syn, or <sup>15</sup>N-Ac- $\alpha$ -syn and <sup>15</sup>N-Ac- $\alpha$ -syn. Detailed data processing procedure could be referred to Methods session.

**Table S2** Identified cross-linked peptides of sample 2 between <sup>15</sup>N-Ac- $\alpha$ -syn and <sup>14</sup>N-Ac- $\alpha$ -syn in LPC (protein: lipid= 1: 50, mol: mol).

| Score    | $\Delta$ (ppm) | Res of Pr 1* | Sequence of Pr 1*                                    | Res of Pr2* | Sequence of Pr 2*                                 | Mass (Da) |
|----------|----------------|--------------|------------------------------------------------------|-------------|---------------------------------------------------|-----------|
| 2.56E-17 | -0.42          | 45           | T <sup>44</sup> <u>K</u> EGVVHGVATVAEK <sup>58</sup> | 12          | A <sup>11</sup> <u>K</u> EGVVAAAEEK <sup>21</sup> | 2733.4911 |
| 3.92E-15 | 0.45           | 12           | A <sup>11</sup> <u>K</u> EGVVAAAEEK <sup>21</sup>    | 23          | T <sup>22</sup> <u>K</u> QGVAAEAGK <sup>32</sup>  | 2268.2324 |
| 3.41E-14 | 0.97           | 34           | T <sup>33</sup> <u>K</u> EGVLYVGSK <sup>43</sup>     | 23          | T <sup>22</sup> <u>K</u> QGVAAEAGK <sup>32</sup>  | 2376.2899 |
| 2.82E-13 | 0.45           | 32           | Q <sup>24</sup> GVAEAAAG <u>K</u> TK <sup>34</sup>   | 10          | G <sup>7</sup> LS <u>K</u> AK <sup>10</sup>       | 1799.0151 |
| 6.88E-13 | 0.59           | 43           | T <sup>33</sup> KEGVLYVGS <u>K</u> TK <sup>45</sup>  | 12          | A <sup>11</sup> <u>K</u> EGVVAAAEEK <sup>21</sup> | 2618.4529 |
| 4.51E-12 | 1.04           | 12           | A <sup>11</sup> <u>K</u> EGVVAAAEEK <sup>21</sup>    | 97          | <u>K</u> <sup>97</sup> DQLGK <sup>102</sup>       | 1897.0519 |
| 2.59E-11 | -2.90          | 23           | T <sup>22</sup> <u>K</u> QGVAAEAGK <sup>32</sup>     | 97          | <u>K</u> <sup>97</sup> DQLGK <sup>102</sup>       | 1884.0315 |
| 1.28E-10 | 0.36           | 32           | Q <sup>24</sup> GVAEAAAG <u>K</u> TK <sup>34</sup>   | 97          | <u>K</u> <sup>97</sup> DQLGK <sup>102</sup>       | 1884.0315 |
| 1.07E-09 | -1.42          | 21           | A <sup>11</sup> KEGVVAAA <u>E</u> KTK <sup>23</sup>  | 12          | A <sup>11</sup> <u>K</u> EGVVAAAEEK <sup>21</sup> | 1965.9903 |
| 2.81E-09 | 2.82           | 21           | E <sup>13</sup> GVVAAA <u>E</u> KTK <sup>23</sup>    | 10          | G <sup>7</sup> LS <u>K</u> AK <sup>10</sup>       | 2510.3954 |
| 7.27E-08 | 0.30           | 43           | T <sup>33</sup> KEGVLYVGS <u>K</u> TK <sup>45</sup>  | 97          | <u>K</u> <sup>97</sup> DQLGK <sup>102</sup>       | 1842.0461 |

$\Delta$ : mass error for crosslink assignments; Res: crosslinked residue (sequence number) within corresponding proteins; Pr: protein; Underlined K in sequence is the cross-linked lysine.

\*The crosslinked pair of residues were from two individual Ac- $\alpha$ -syn: <sup>14</sup>N-Ac- $\alpha$ -syn and <sup>14</sup>N-Ac- $\alpha$ -syn, <sup>14</sup>N-Ac- $\alpha$ -syn and <sup>15</sup>N-Ac- $\alpha$ -syn, <sup>15</sup>N-Ac- $\alpha$ -syn and <sup>14</sup>N-Ac- $\alpha$ -syn, or <sup>15</sup>N-Ac- $\alpha$ -syn and <sup>15</sup>N-Ac- $\alpha$ -syn. Detailed data processing procedure could be referred to Methods session.

**Table S3** Identified cross-linked peptides of sample 3 between <sup>15</sup>N-Ac- $\alpha$ -syn and <sup>14</sup>N-Ac- $\alpha$ -syn in LPC (protein: lipid= 1: 50, mol: mol).

| Score    | $\Delta$ (ppm) | Res of Pr 1* | Sequence of Pr 1*                                                     | Res of Pr2* | Sequence of Pr 2*                                          | Mass (Da) |
|----------|----------------|--------------|-----------------------------------------------------------------------|-------------|------------------------------------------------------------|-----------|
| 3.49E-15 | 0.21           | 12           | A <sup>11</sup> <u>K</u> EGVVAAA <u>E</u> K <sup>21</sup>             | 23          | T <sup>22</sup> <u>K</u> QGVAAE <u>A</u> AGK <sup>32</sup> | 2268.2324 |
| 1.32E-13 | 3.78           | 60           | T <sup>59</sup> <u>K</u> EQVTNVGGAVVTGVTAVAQK <sup>80</sup>           | 34          | T <sup>33</sup> <u>K</u> EGVLYVGSK <sup>43</sup>           | 3473.8980 |
| 4.26E-13 | 2.34           | 34           | T <sup>33</sup> <u>K</u> EGVLYVGSK <sup>43</sup>                      | 23          | T <sup>22</sup> <u>K</u> QGVAAE <u>A</u> AGK <sup>32</sup> | 2376.2899 |
| 1.14E-12 | 0.67           | 12           | A <sup>11</sup> <u>K</u> EGVVAAA <u>E</u> K <sup>21</sup>             | 97          | <u>K</u> <sup>97</sup> DQLGK <sup>102</sup>                | 1897.0519 |
| 2.32E-12 | 1.24           | 45           | T <sup>44</sup> <u>K</u> EGVVHGVATVAEK <sup>58</sup>                  | 23          | T <sup>22</sup> <u>K</u> QGVAAE <u>A</u> AGK <sup>32</sup> | 2720.4707 |
| 5.94E-12 | 1.20           | 96           | T <sup>81</sup> VEGAGSIAAATGFV <u>K</u> K <sup>97</sup>               | 12          | A <sup>11</sup> <u>K</u> EGVVAAA <u>E</u> K <sup>21</sup>  | 2815.5330 |
| 1.07E-10 | 0.52           | 43           | T <sup>33</sup> <u>K</u> EGVLYVGS <u>K</u> TK <sup>45</sup>           | 12          | A <sup>11</sup> <u>K</u> EGVVAAA <u>E</u> K <sup>21</sup>  | 2618.4529 |
| 5.04E-09 | 0.91           | 21           | A <sup>11</sup> <u>K</u> EGVVAAA <u>E</u> KTK <sup>23</sup>           | 97          | <u>K</u> <sup>97</sup> DQLGK <sup>102</sup>                | 2126.1946 |
| 2.29E-08 | 1.40           | 96           | T <sup>91</sup> VEGAGSIAAATGFV <u>K</u> K <sup>97</sup>               | 23          | T <sup>22</sup> <u>K</u> QGVAAE <u>A</u> AGK <sup>32</sup> | 2802.5126 |
| 1.52E-07 | 1.15           | 43           | T <sup>33</sup> <u>K</u> EGVLYVGS <u>K</u> TK <sup>45</sup>           | 10          | G <sup>7</sup> LS <u>K</u> AK <sup>10</sup>                | 2149.2357 |
| 2.52E-07 | -3.62          | 34           | T <sup>33</sup> <u>K</u> EGVLYVGSK <sup>43</sup>                      | 12          | A <sup>11</sup> <u>K</u> EGVVAAA <u>E</u> K <sup>21</sup>  | 2389.3103 |
| 5.32E-07 | -2.34          | 60           | T <sup>59</sup> <u>K</u> EQVTNVGGAVVTGVTAVAQK <sup>80</sup>           | 21          | E <sup>13</sup> GVVAAA <u>E</u> KTK <sup>23</sup>          | 3395.8510 |
| 7.21E-07 | 0.58           | 12           | A <sup>11</sup> <u>K</u> EGVVAAA <u>E</u> K <sup>21</sup>             | 12          | A <sup>11</sup> <u>K</u> EGVVAAA <u>E</u> K <sup>21</sup>  | 2281.2528 |
| 7.33E-07 | 2.58           | 32           | T <sup>22</sup> <u>K</u> QGVAAE <u>A</u> AG <u>K</u> TK <sup>34</sup> | 23          | T <sup>22</sup> <u>K</u> QGVAAE <u>A</u> AGK <sup>32</sup> | 2484.3546 |
| 8.89E-07 | 0.99           | 21           | E <sup>13</sup> GVVAAA <u>E</u> KTK <sup>23</sup>                     | 10          | G <sup>7</sup> LS <u>K</u> AK <sup>10</sup>                | 1842.0461 |

$\Delta$ : mass error for crosslink assignments; Res: crosslinked residue (sequence number) within corresponding proteins; Pr: protein; Underlined K in sequence is the cross-linked lysine.

\*The crosslinked pair of residues were from two individual Ac- $\alpha$ -syn: <sup>14</sup>N-Ac- $\alpha$ -syn and <sup>14</sup>N-Ac- $\alpha$ -syn, <sup>14</sup>N-Ac- $\alpha$ -syn and <sup>15</sup>N-Ac- $\alpha$ -syn, <sup>15</sup>N-Ac- $\alpha$ -syn and <sup>14</sup>N-Ac- $\alpha$ -syn, or <sup>15</sup>N-Ac- $\alpha$ -syn and <sup>15</sup>N-Ac- $\alpha$ -syn. Detailed data processing procedure could be referred to Methods session.

**Table S4** Identified cross-linked peptides of sample 1 between  $^{15}\text{N}$ -Ac- $\alpha$ -syn and  $^{14}\text{N}$ -Ac- $\alpha$ -syn in DOPS (protein: lipid= 1: 50, mol: mol).

| Score    | $\Delta$ (ppm) | Res of Pr 1* | Sequence of Pr 1*                                    | Res of Pr2* | Sequence of Pr 2*                                 | Mass (Da) |
|----------|----------------|--------------|------------------------------------------------------|-------------|---------------------------------------------------|-----------|
| 2.08E-16 | 0.45           | 32           | Q <sup>24</sup> GVAEAAG <u>K</u> TK <sup>34</sup>    | 10          | G <sup>7</sup> LS <u>K</u> AK <sup>10</sup>       | 1799.0151 |
| 2.67E-14 | 2.65           | 45           | T <sup>44</sup> <u>K</u> EGVVHGVATVAEK <sup>58</sup> | 23          | T <sup>22</sup> <u>K</u> QGVAEAAGK <sup>32</sup>  | 2720.4707 |
| 4.22E-14 | -2.67          | 45           | T <sup>44</sup> <u>K</u> EGVVHGVATVAEK <sup>58</sup> | 12          | A <sup>11</sup> <u>K</u> EGVVAAA EK <sup>21</sup> | 2733.4911 |
| 1.76E-12 | -0.66          | 12           | A <sup>11</sup> <u>K</u> EGVVAAA EK <sup>21</sup>    | 23          | T <sup>22</sup> <u>K</u> QGVAEAAGK <sup>32</sup>  | 2268.2324 |
| 1.92E-09 | -0.87          | 21           | E <sup>13</sup> GVVAAA EK <u>T</u> K <sup>23</sup>   | 23          | T <sup>22</sup> <u>K</u> QGVAEAAGK <sup>32</sup>  | 2298.2430 |
| 8.17E-09 | 1.29           | 21           | A <sup>11</sup> KEGVVAAA EK <u>T</u> K <sup>23</sup> | 10          | G <sup>7</sup> LS <u>K</u> AK <sup>10</sup>       | 2041.1782 |

$\Delta$ : mass error for crosslink assignments; Res: crosslinked residue (sequence number) within corresponding proteins; Pr: protein; Underlined K in sequence is the cross-linked lysine.

\*The crosslinked pair of residues were from two individual Ac- $\alpha$ -syn:  $^{14}\text{N}$ -Ac- $\alpha$ -syn and  $^{14}\text{N}$ -Ac- $\alpha$ -syn,  $^{14}\text{N}$ -Ac- $\alpha$ -syn and  $^{15}\text{N}$ -Ac- $\alpha$ -syn,  $^{15}\text{N}$ -Ac- $\alpha$ -syn and  $^{14}\text{N}$ -Ac- $\alpha$ -syn, or  $^{15}\text{N}$ -Ac- $\alpha$ -syn and  $^{15}\text{N}$ -Ac- $\alpha$ -syn. Detailed data processing procedure could be referred to Methods session.

**Table S5** Identified cross-linked peptides of sample 2 between <sup>15</sup>N-Ac- $\alpha$ -syn and <sup>14</sup>N-Ac- $\alpha$ -syn in DOPS (protein: lipid= 1: 50, mol: mol).

| Score    | $\Delta$ (ppm) | Res of Pr 1* | Sequence of Pr 1*                                       | Res of Pr2* | Sequence of Pr 2*                                  | Mass (Da) |
|----------|----------------|--------------|---------------------------------------------------------|-------------|----------------------------------------------------|-----------|
| 3.01E-15 | -0.73          | 43           | T <sup>33</sup> KEGVLYVGS <u>K</u> TK <sup>45</sup>     | 43          | E <sup>35</sup> GVLVYVGS <u>K</u> TK <sup>45</sup> | 2726.5105 |
| 1.71E-11 | 2.06           | 96           | T <sup>81</sup> VEGAGSIAAATGFV <u>K</u> K <sup>97</sup> | 12          | A <sup>11</sup> <u>K</u> EGVVAAAEK <sup>21</sup>   | 2815.5330 |
| 1.22E-10 | -2.90          | 32           | Q <sup>24</sup> GVAEAAG <u>K</u> TK <sup>34</sup>       | 97          | <u>K</u> <sup>97</sup> DQLGK <sup>102</sup>        | 1884.0315 |
| 3.80E-08 | -0.35          | 96           | T <sup>81</sup> VEGAGSIAAATGFV <u>K</u> K <sup>97</sup> | 10          | G <sup>7</sup> LS <u>K</u> AK <sup>10</sup>        | 2346.3157 |
| 4.64E-07 | 0.38           | 23           | T <sup>22</sup> <u>K</u> QGVAEAAGK <sup>32</sup>        | 23          | T <sup>22</sup> <u>K</u> QGVAEAAGK <sup>32</sup>   | 2255.2120 |

$\Delta$ : mass error for crosslink assignments; Res: crosslinked residue (sequence number) within corresponding proteins; Pr: protein; Underlined K in sequence is the cross-linked lysine.

\*The crosslinked pair of residues were from two individual Ac- $\alpha$ -syn: <sup>14</sup>N-Ac- $\alpha$ -syn and <sup>14</sup>N-Ac- $\alpha$ -syn, <sup>14</sup>N-Ac- $\alpha$ -syn and <sup>15</sup>N-Ac- $\alpha$ -syn, <sup>15</sup>N-Ac- $\alpha$ -syn and <sup>14</sup>N-Ac- $\alpha$ -syn, or <sup>15</sup>N-Ac- $\alpha$ -syn and <sup>15</sup>N-Ac- $\alpha$ -syn. Detailed data processing procedure could be referred to Methods session.

**Table S6** Identified cross-linked peptides of sample 3 between <sup>15</sup>N-Ac- $\alpha$ -syn and <sup>14</sup>N-Ac- $\alpha$ -syn in DOPS (protein: lipid= 1: 50, mol: mol).

| Score    | $\Delta$ (ppm) | Res of Pr 1* | Sequence of Pr 1*                                         | Res of Pr2* | Sequence of Pr 2*                                         | Mass (Da) |
|----------|----------------|--------------|-----------------------------------------------------------|-------------|-----------------------------------------------------------|-----------|
| 4.55E-14 | 0.36           | 32           | Q <sup>24</sup> GVAEAAG <u>K</u> TEGVLYVGSK <sup>43</sup> | 21          | A <sup>11</sup> KEGVVAAA <u>E</u> KTK <sup>23</sup>       | 3429.8717 |
| 9.60E-14 | 0.25           | 32           | Q <sup>24</sup> GVAEAAG <u>K</u> TK <sup>34</sup>         | 10          | G <sup>7</sup> LS <u>K</u> AK <sup>10</sup>               | 1799.0151 |
| 1.05E-07 | -1.97          | 45           | T <sup>44</sup> <u>K</u> EGVVHGVATVAEK <sup>58</sup>      | 43          | E <sup>35</sup> GVLYVGS <u>K</u> TK <sup>45</sup>         | 2841.5486 |
| 1.08E-07 | 1.16           | 23           | T <sup>22</sup> <u>K</u> QGVAEAAGK <sup>32</sup>          | 32          | Q <sup>24</sup> GVAEAAG <u>K</u> TK <sup>34</sup>         | 2255.2120 |
| 2.30E-07 | -1.49          | 96           | T <sup>81</sup> VEGAGSIAAATGFV <u>K</u> K <sup>97</sup>   | 12          | A <sup>11</sup> <u>K</u> EGVVAAA <u>E</u> K <sup>21</sup> | 2815.5330 |
| 5.89E-07 | 3.15           | 6            | M <sup>1</sup> DVFM <u>K</u> GLSK <sup>10</sup>           | 32          | Q <sup>24</sup> GVAEAAG <u>K</u> TK <sup>34</sup>         | 2351.2228 |

$\Delta$ : mass error for crosslink assignments; Res: crosslinked residue (sequence number) within corresponding proteins; Pr: protein; Underlined K in sequence is the cross-linked lysine.

\*The crosslinked pair of residues were from two individual Ac- $\alpha$ -syn: <sup>14</sup>N-Ac- $\alpha$ -syn and <sup>14</sup>N-Ac- $\alpha$ -syn, <sup>14</sup>N-Ac- $\alpha$ -syn and <sup>15</sup>N-Ac- $\alpha$ -syn, <sup>15</sup>N-Ac- $\alpha$ -syn and <sup>14</sup>N-Ac- $\alpha$ -syn, or <sup>15</sup>N-Ac- $\alpha$ -syn and <sup>15</sup>N-Ac- $\alpha$ -syn. Detailed data processing procedure could be referred to Methods session.
